## High salt induces P-glycoprotein mediated treatment resistance in breast cancer cells through store operated calcium influx

Duaa Babaer<sup>1</sup>, Suneetha Amara<sup>2</sup>, Michael Ivy<sup>1</sup>, Yan Zhao<sup>3</sup>, Philip E. Lammers<sup>4</sup>, Jens M. Titze<sup>3,5</sup> and Venkataswarup Tiriveedhi<sup>1,6</sup>

<sup>1</sup>Department of Biological Sciences, Tennessee State University, Nashville, TN, USA

<sup>2</sup>Department of Medicine, St Thomas-Midtown Hospital, Nashville, TN, USA

<sup>3</sup>Division of Clinical Pharmacology, Vanderbilt University Medical Center, Nashville, TN, USA

<sup>4</sup>Department of Medicine, Meharry Medical College, Nashville, TN, USA

<sup>5</sup>Cardiovascular and Metabolic Disorders program, Duke-NUS Medical School, Singapore

<sup>6</sup>Department of Pharmacology, Vanderbilt University, Nashville, TN, USA

**Correspondence to:** Venkataswarup Tiriveedhi, **email:** vtirivee@tnstate.edu

**Keywords:** breast cancer; salt; P-glycoprotein; store operated calcium entry; prostratin

**Received:** April 02, 2018

**Accepted:** April 28, 2018

**Published:** May 18, 2018

**Copyright:** Babaer et al. This is an open-access article distributed under the terms of the Creative Commons Attribution License 3.0 (CC BY 3.0), which permits unrestricted use, distribution, and reproduction in any medium, provided the original author and source are credited.

### ABSTRACT

Recent evidence from our laboratory has demonstrated that high salt ( $\Delta 0.05$  M NaCl) induced inflammatory response and cancer cell proliferation through salt inducible kinase-3 (SIK3) upregulation. As calcium influx is known to effect inflammatory response and drug resistance, we examined the impact of high salt on calcium influx in breast cancer cells. Treatment of MCF-7 and MDA-MB-231 cells with high salt induced an enhanced intracellular calcium intensity, which was significantly decreased by store operated calcium entry (SOCE) inhibitor co-treatment. Further, high salt induced P-glycoprotein (P-gp) mediated paclitaxel drug resistance in breast cancer cells. Murine tumor studies demonstrated that injection of MCF-7 cells cultured in high salt, exerted higher tumorigenicity compared to the basal cultured counterpart. Knock down of SIK3 by specific shRNA inhibited tumorigenicity, expression of SOCE regulators and P-gp activity, suggesting SIK3 is an upstream mediator of SOCE induced calcium influx. Furthermore, small molecule inhibitor, prostratin, exerted anti-tumor effect in murine models through SIK3 inhibition. Taken together, we conclude that SIK3 is an upstream regulator of store operated calcium entry proteins, Orai1 and STIM1, and mediates high salt induced inflammatory cytokine responses and P-gp mediated drug resistance. Therefore, small molecule inhibitors, such as prostratin, could offer novel anti-cancer approaches.

### INTRODUCTION

Breast cancer is the second leading cause of cancer related mortality in American women [1]. Despite the significant improvement in both diagnostic and therapeutic modalities for the treatment of cancer patients, about 30% of patients with early-stage breast cancer succumb to recurrent disease [2]. While, systemic anti-cancer agents are effective at the beginning of therapy both in primary breast cancers and metastases, however, after a

variable period of time, resistance to therapy is common mainly due to emergence of tumor variance phenotypes [3]. Although the elimination of transformed cells by host immune responses result in immune sculpting, and emergence of new treatment resistant tumor variants, the exact mechanisms and molecular factors in the tumor microenvironment mediating this cancer resistance are yet undefined [4].

Recent evidence from our laboratory has demonstrated that under high salt (50 mM above basal

condition  $\Delta 0.05$  M NaCl) external treatment conditions, breast cancer cells induce chronic inflammatory response with enhanced expression of inflammatory cytokines and reactive oxygen/nitrogen species (RNS/ROS) [5, 6]. Interestingly, sodium-magnetic resonance imaging ( $\text{Na}^{23}$ -MRI) studies performed in breast cancer patients have demonstrated an increased sodium content of up to 50–70% in breast tumors as compared with surrounding soft tissue [7, 8]. These  $\text{Na}^{23}$ -MRI studies in corroboration with our *in vitro* data argue for a potential effector role of salt in the tumor microenvironment towards promotion of tumor progression and probably treatment resistance in breast cancer cells.

Calcium influx mediated signaling response is well known to induce expression and secretion of inflammatory cytokines [9]. Altered expression of STIM1 and Orai1, key molecular components of store operated calcium entry (SOCE) pathways have been reported in cervical cancer [10], breast cancer [11], and esophageal cancer [12]. Further, P-glycoprotein upregulation is well known to induce treatment resistance in cancer cells. P-glycoprotein is a product of the multi drug resistance gene complex (MDR) and functions as an energy-dependent drug efflux pump and acts by active intra-cellular removal of anti-cancer drugs and there by development of treatment-resistant tumor variants [13]. In our current communication, we studied the potential role of high salt treatment towards induction of calcium influx mediated inflammatory signaling and its interplay towards induction of P-glycoprotein mediated treatment resistance.

## RESULTS

### Store operated calcium channels are critical for high salt mediated inflammatory cytokine release

We have previously demonstrated that high salt treatment ( $\Delta 0.05$  M NaCl) induced expression of inflammatory cytokines by breast cancer cells [5]. As the ubiquitous second messenger,  $\text{Ca}^{2+}$ , is one of the critical regulators of inflammatory responses, we investigated the interplay of  $\text{Ca}^{2+}$  influx on high salt mediated cytokine release [14]. Towards this we first performed a Fluo-3 (a fluorescent  $\text{Ca}^{2+}$  indicator)-based  $\text{Ca}^{2+}$  measurement, to determine the induction of calcium influx following high salt treatment on breast cancer cell lines, MCF-7 and MDA-MB-231. As shown in Figure 1, high salt treatment induced an enhanced calcium influx peak. Normally, the cytoplasmic calcium influx peak consists of two phases, a peak phase contributed by  $\text{Ca}^{2+}$  release from intracellular  $\text{Ca}^{2+}$  stores and a plateau phase contributed by  $\text{Ca}^{2+}$  influx. As shown in Figure 1A, SKF96365, an inhibitor of store operated  $\text{Ca}^{2+}$  entry (SOCE) [15], decreased the amplitude of the plateau phase of the high salt-induced  $\text{Ca}^{2+}$  response without affecting the peak phase. Similar results were

observed with EGTA, which chelates extracellular  $\text{Ca}^{2+}$ . Quantitative analysis of the fluorescence intensity changes of the plateau phase demonstrated that high salt induced a  $76 \pm 10\%$  calcium influx induced Fluo-3 intensity change. Here, 0.1 M mannitol is used as a negative control for the high salt (0.05 M NaCl) treatment. NaCl being a bi-ionic species the ionic osmolar equivalent of 0.05 M NaCl is 0.1 M mannitol. As shown in Figure 1A, treatment of cancer cells with equivalent mannitol concentration did not induce a calcium response, and thus suggesting that the calcium signal changes were a direct consequence of salt induced phenomenon and not a secondary effect as consequence of osmolar-changes induced by high salt. Interestingly, SKF96365 decreased the change ( $24 \pm 6\%$ ,  $p < 0.05$ ) in plateau phase of calcium influx, similar to the effect shown by EGTA. However, inhibitors of voltage-gated  $\text{Ca}^{2+}$  channels (nimodipine), NMDA receptors (2-AP), or AMPA receptors (CNQX) had minimal effect (Figure 1A and 1B). Further, ELISA based analysis of the TNF- $\alpha$  (Figure 1C) in the cell supernatant from MCF-7 cells following high salt treatment was determined to be  $583 \pm 109$  pg/mL ( $p < 0.05$ , compared to basal normal salt treatment which is  $161 \pm 109$  pg/mL). However, with SKF96365, a SOCE specific inhibitor treatment under high salt conditions induced inhibition of TNF- $\alpha$  secretion ( $243 \pm 64$  pg/mL,  $P < 0.05$  compared to high salt treatment). Similarly, ELISA based analysis of the CXCL12 (Figure 1D) in the cell supernatant from MCF-7 cells following high salt treatment was determined to be  $314 \pm 54$  pg/mL ( $p < 0.05$ , compared to basal normal salt treatment which is  $73 \pm 32$  pg/mL). However, with SKF96365, a SOCE specific inhibitor treatment under high salt conditions induced inhibition of CXCL12 secretion ( $138 \pm 44$  pg/mL,  $P < 0.05$  compared to high salt treatment). Collectively, the inhibition of SOCE demonstrated decreased expression of high salt-induced release of inflammatory cytokine and chemokine, TNF- $\alpha$  and CXCL12, respectively, in the breast cancer cells MCF-7 and MDA-MB-231 (Figure 1C, 1D). Therefore, these data suggest that high salt induces its inflammatory response through upregulation of SOCE mediated  $\text{Ca}^{2+}$  influx.

### STIM1 and Orai1 are required for high salt mediated inflammatory response

Several studies from other laboratories have demonstrated that the proteins, STIM1 and Orai1, are responsible for store-operated  $\text{Ca}^{2+}$  entry [16]. To examine whether STIM1 and Orai1 are important molecular components involved in high salt mediated inflammatory responses, we used RNA interference (RNAi) to knock down STIM1 and Orai1 in MCF-7 and MDA-MB-231 human breast cancer cells. The successful knockdown of STIM1 or Orai1 mRNA was confirmed by western blot (Figure 2A–2C). Furthermore, the reduction of functional store-operated  $\text{Ca}^{2+}$  entry was verified by Fluo-

3-based measurements (Figure 2D). Store-operated  $\text{Ca}^{2+}$  channels are activated when internal  $\text{Ca}^{2+}$  stores are empty. Thapsigargin was used to empty the intracellular  $\text{Ca}^{2+}$  stores in the absence of extracellular  $\text{Ca}^{2+}$ . The  $\text{Ca}^{2+}$  influx was then measured by addition of 2 mM extracellular  $\text{Ca}^{2+}$ . Both STIM1 and Orai1 siRNAs reduced the level of  $\text{Ca}^{2+}$  influx compared to control scramble siRNA (Figure 2D). Further, importantly, knock down of STIM1 and Orai1 inhibited the high salt mediated inflammatory response (Figure 2E and 2F) by MCF-7 and MDA-MB-231. Therefore, these data demonstrate that SOCE mediated  $\text{Ca}^{2+}$  influx is critical for the high salt induces its inflammatory response in breast cancer cells.

### High salt induces upregulation of P-glycoprotein, a drug resistance efflux pump

Our previous studies have demonstrated that high salt treatment ( $\Delta 0.05$  M NaCl) along with inflammatory stress (as noted by enhanced reactive nitrogen and oxygen species) has also induced a 24% proliferation of cancer cells compared to basal culture conditions [5]. As chronic inflammatory stress is known to result in cancer cell variants, we next performed experiments to determine if high salt also induces treatment resistance phenotype in breast cancer cells [17]. Towards this, we have passaged MCF-7 and MDA-MB-231 cells in high salt for eight passages and will be referred to as MCF-7s and 231s, respectively. As shown in

Figure 3A and 3B, high salt treated MCF-7s were resistant to paclitaxel induced cytotoxicity as measured by  $\text{IC}_{50}$  and  $C_{\text{max}}$  compared to basal culture conditions. Further literature evidence suggests that the emergence of chemotherapeutic multidrug resistance (MDR) was associated with increased levels of a transmembrane glycoprotein, P-glycoprotein (P-gp). Therefore, we tested if there is change in P-gp expression following high salt treatment. As shown in Figure 3C, high salt treatment in both MCF-7s and 231s cell lines, induced enhanced expression of chemoresistance factor, P-gp. Further, it is important to note that knock down of SOCE  $\text{Ca}^{2+}$  regulator molecules STIM1 and Orai1-enhanced paclitaxel sensitivity (Figure 3B) and reduced the expression of P-gp (Figure 3C). This suggests that high salt mediated calcium influx regulates the development of drug resistance in salt passaged breast cancer cells. Further, to determine the functionality of the high salt mediated expression of P-gp, a membrane drug efflux channel, we performed rhodamine 123 efflux assay. The cells are pre-treated with rhodamine 123 for 1 hour, and then washed and measured for intracellular accumulation of the dye. The P-gp is a specific membrane protein which facilitates the efflux of rhodamine 123, and cells with higher expression of P-gp have poor intracellular accumulation of rhodamine 123. As shown in Figure 3D, high salt passaged cells (MCF-7s and 231s) demonstrated decreased cellular accumulation of rhodamine 123 ( $37 \pm 8$  RFU and  $22 \pm 7$  RFU, respectively) compared to breast

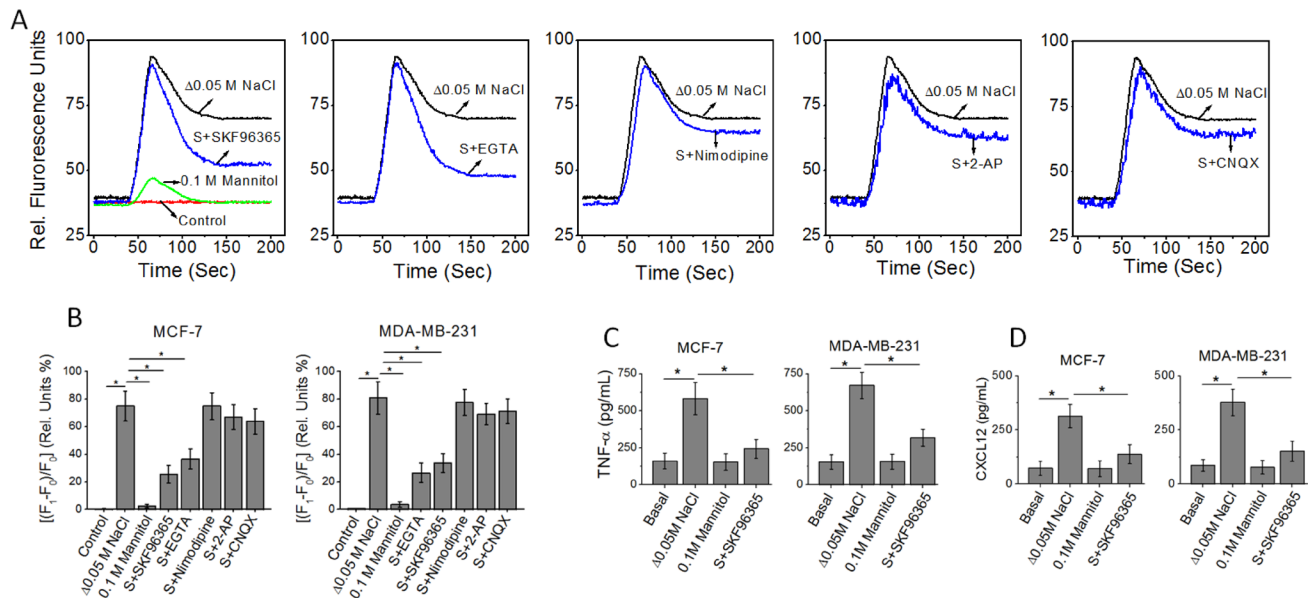

**Figure 1:** (A) Fluo-3  $\text{Ca}^{2+}$  measurement indicates that SKF96365 (10  $\mu\text{M}$ , inhibitor of store operated  $\text{Ca}^{2+}$  entry) and EGTA (2 mM) treatments decrease high salt ( $\Delta 0.05$  M NaCl) induced  $\text{Ca}^{2+}$  influx in MCF-7 breast cancer cells. The basal (normal salt) treatment is indicated in red as control. While inhibitors of voltage-gated  $\text{Ca}^{2+}$  channels (nimodipine, 10  $\mu\text{M}$ ), NMDA receptors (2-AP, 10  $\mu\text{M}$ ), or AMPA receptors (CNQX, 10  $\mu\text{M}$ ) had no effect on high salt-induced calcium influx. (B) Quantitative changes high salt induced calcium influx measured by relative fluorescence shift ( $\Delta F/F_0 \times 100$ ) in MCF-7 and MDA-MB-231 breast cancer cells following various treatment conditions. F1, plateau phase fluorescence; F0, baseline fluorescence. (C, D) Inhibition of inflammatory cytokine TNF- $\alpha$  (C), and inflammatory chemokine CXCL12 (D) expression MCF-7 and MDA-MB-231 breast cancer cells in following treatment with SOCE inhibitor. Data were representative of five experiments and shown as mean  $\pm$  SEM,  $p < 0.05$ .

cancer cells cultured under basal condition (rhodamine efflux in MCF-7 and MDA-231 is normalized 100 RFU). In the presence of cyclosporin-A, a known specific P-gp inhibitor [18], and P-gp knock down there is enhanced intracellular rhodamine 123 accumulation in the high salt passaged cancer cells, thus clearly suggesting that the drug efflux functionality of P-gp is specifically upregulated in the high salt mediated drug resistance. Importantly, knock down of SOCE calcium regulators STIM1 and Orai1 (Figure 3D) increased intracellular rhodamine 123 accumulation and thus arguing for a critical role of SOCE mechanism in high salt mediated

P-gp expression leading to drug resistance. To test for the reversible nature of the SOCE expression under normal salt (basal condition) treatment following high salt treatment (for 8 passages), we have cultured the MCF-7s cells in regular basal conditions for 5 passages (these cells will be referred as MCF-7sr cells). As shown in Figure 3E-3G, reversing the salt treatment conditions to basal levels in MCF-7sr cells reversed the expression of Orai1, STIM1 and P-glycoprotein to basal levels. These data suggest that the high induced SOCE expression and P-glycoprotein mediated drug resistance is a reversible phenomenon.

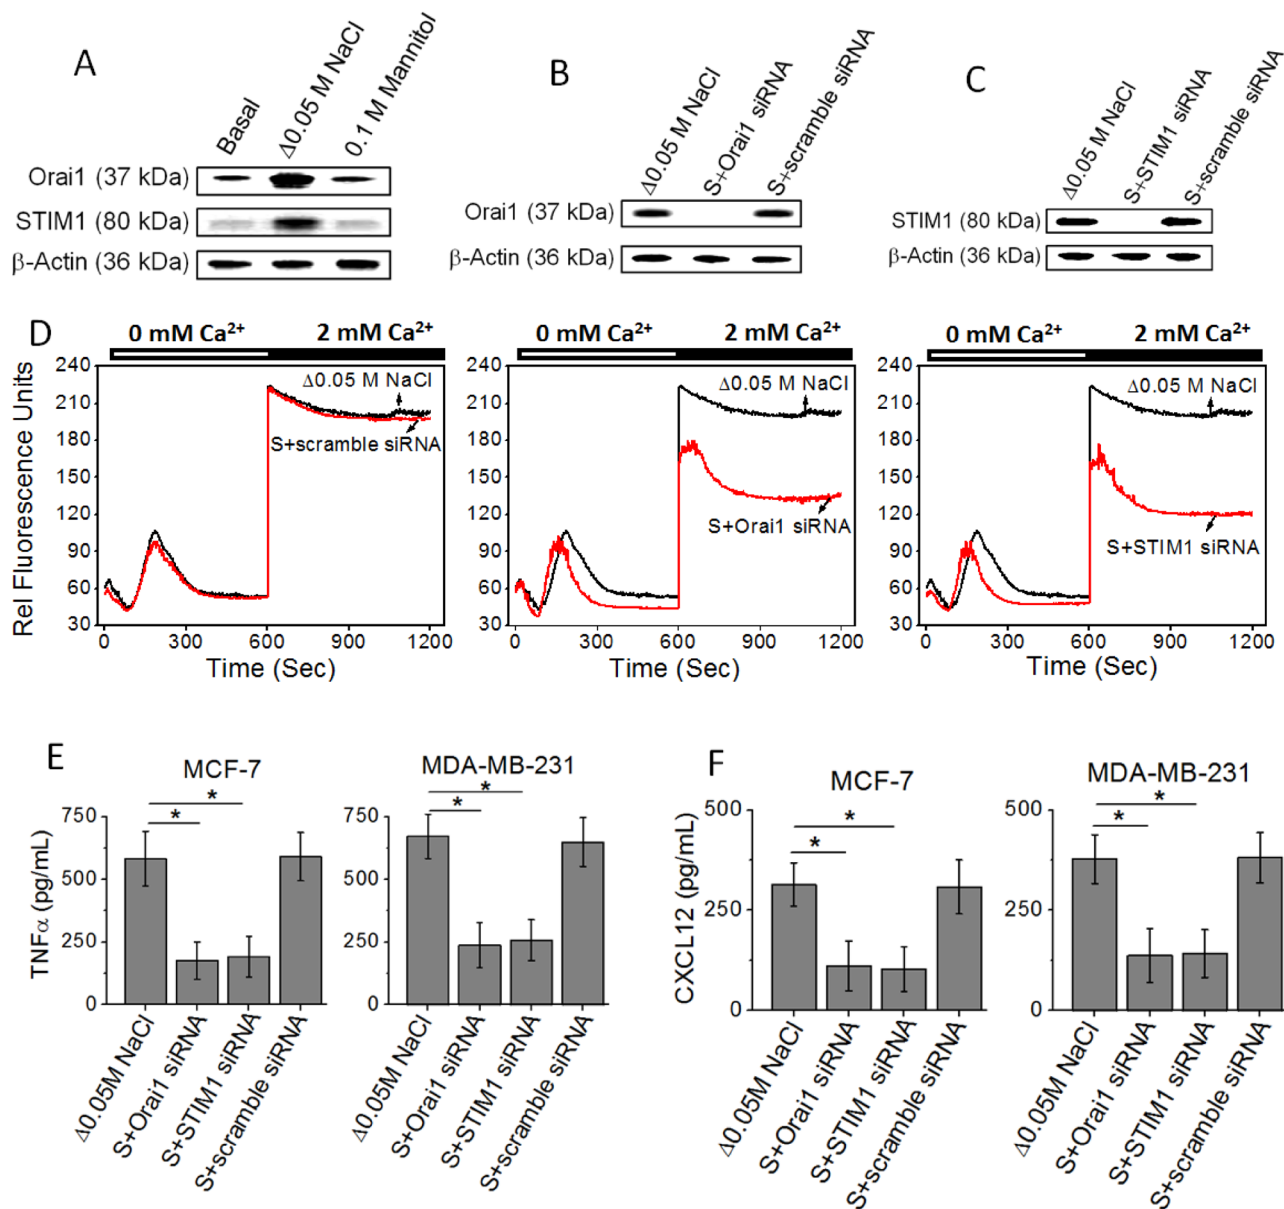

**Figure 2:** (A) Western blot analysis to demonstrate the expression of Orai1 and STIM1 following high salt treatment ( $\Delta 0.05$  M NaCl). (B, C) Inhibition of Orai1 (B) and STIM1 (C) following high salt+specific siRNA treatment. (D) Fluo-3  $\text{Ca}^{2+}$  measurement indicates that STIM1 siRNA and Orai1 siRNA decrease store-operated  $\text{Ca}^{2+}$  influx in MCF-7 cells. (E, F) Inhibition of inflammatory cytokine TNF- $\alpha$  (E), and inflammatory chemokine CXCL12 (F) expression MCF-7 and MDA-MB-231 breast cancer cells in following siRNA based knock down of Orai1 and STIM1. Data were representative of five experiments and shown as mean  $\pm$  SEM,  $p < 0.05$ .



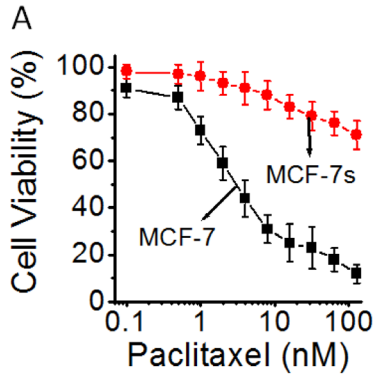

**B**

|                  | MCF-7                 |                      | MDA-MB-231            |                      |
|------------------|-----------------------|----------------------|-----------------------|----------------------|
|                  | IC <sub>50</sub> (nM) | C <sub>max</sub> (%) | IC <sub>50</sub> (nM) | C <sub>max</sub> (%) |
| U/S              | 2.1±0.3*              | 89±8*                | 5.9±1.8*              | 73±9*                |
| NaCl             | 12.4±2.9              | 32±5                 | 21.3±5.1              | 24±7                 |
| S+ Orai1 siRNA   | 6.3±1.2*              | 73±9*                | 8.3±2.2*              | 58±10*               |
| S+ STIM1 siRNA   | 5.7±0.9*              | 69±11*               | 9.7±2.5*              | 51±8*                |
| S+ control siRNA | 2.7±0.8*              | 81±9*                | 6.4±1.9*              | 66±9*                |

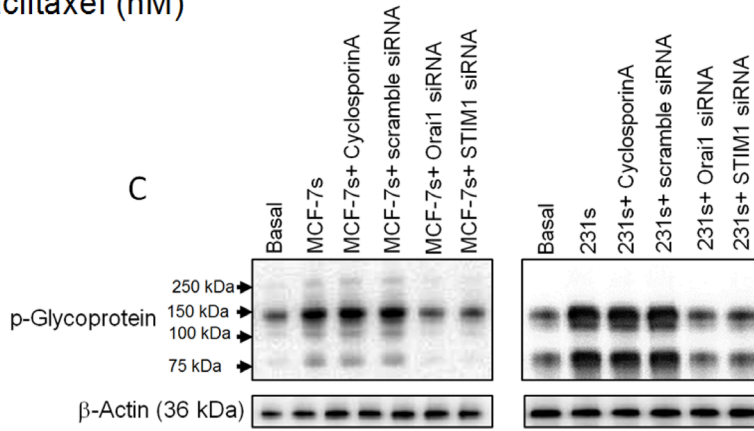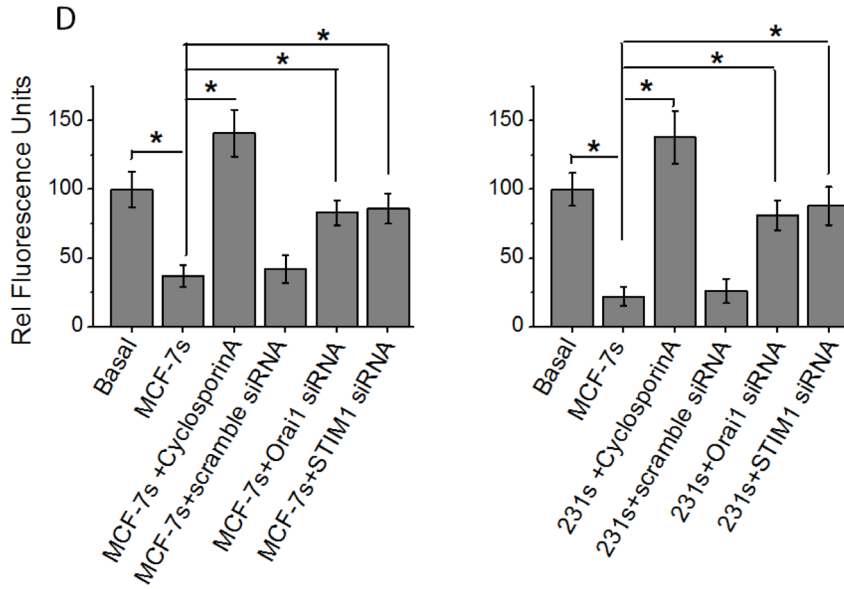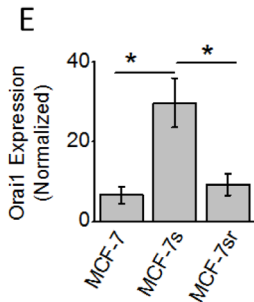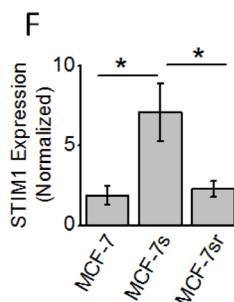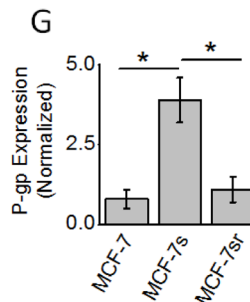

**Figure 3:** (A) Impact of high salt treatment on paclitaxel resistance. MCF-7 cells were cultured under basal conditions; MCF-7s cells were passaged eight times in high salt added cell culture media ( $\Delta 0.05$  M NaCl). (B) Pharmacokinetic parameters of paclitaxel cytotoxicity following various treatment conditions. (C) Western blot analysis of P-glycoprotein expression following high salt treatment. MCF-7s, represent MCF-7 cells were passaged eight times in high salt added cell culture media ( $\Delta 0.05$  M NaCl); 231s, represents MDA-MB-231 cells passaged eight times in high salt added cell culture media ( $\Delta 0.05$  M NaCl). (D) Impact of high salt treatment on intracellular Rhodamine-123 accumulation. Rhodamine 123 is pumped out of the cell during enhanced expression of P-glycoprotein. (E–G) The high salt treated cells (for 8 passages) were later cultured in normal salt containing basal media for 5 passages (referred to as MCF-sr) and then tested for the expression of Orai1 (E), STIM1 (F) and P-glycoprotein (G). Data were representative of five experiments and shown as mean  $\pm$  SEM,  $p < 0.05$ .

### Enhanced tumorigenicity of high salt pre-treated breast cancer cells

To determine the effect of high salt passage on tumorigenicity of breast cancer cells we performed *in vivo* studies. Orthotopic tumors were induced following intramammary injection of  $5 \times 10^5$  cancer cells (MCF-7 or MCF-7s) in Nu/J mice. As shown in Figure 4A, tumor volume at the end of day 39 in mice injected with high salt passaged MCF-7s cells was  $498 \pm 41$  mm<sup>3</sup>; while tumor volume in mice injected by MCF-7 cells on day 39 was  $271 \pm 43$  mm<sup>3</sup> ( $p < 0.05$ ). Further, mRNA based gene expression analyses (Figure 4B–4D) demonstrated an enhanced expression of SOCE regulatory molecules Orai1 and STIM1, and drug resistance protein P-gp. Using cell based phosphoproteomics approach and further functional analyses; we have previously demonstrated salt inducible kinase-3 (SIK3) mediates high salt mediated cell proliferation and inflammatory responses. In our current *in vivo* studies, we further confirm that in the orthotopic MCF-7s tumors there is 3.3 ( $p < 0.05$ ) fold enhanced expression of SIK3 (Figure 4E) compared to orthotopic MCF-7 induced tumors. These data suggest that high salt pretreatment enhances the cell proliferation and tumorigenicity of breast cancer cells.

### Decreased tumorigenicity following knock down of Orai1 in high salt pre-treated breast cancer cells

As SOCE mediated calcium influx regulator Orai1 played a critical role in high salt mediated inflammatory response and paclitaxel resistance, we next tested the impact of Orai1 knock down on the *in vivo* tumorigenicity of breast cancer cells. Orthotopic tumors were induced with MCF-7s control shRNA treated (MCF-7s-Cntl-shRNA) or Orai1 shRNA treated (MCF-7s-Orai1-KO) in Nu/J mice. As shown in Figure 5A, tumor volume at the end of day 39 in mice injected with high salt passaged MCF-7s cells was  $483 \pm 64$  mm<sup>3</sup>; while tumor volume in mice injected by Orai1-KO-MCF-7s cells on day 39 was  $316 \pm 72$  mm<sup>3</sup> ( $p < 0.05$ ). Further, mRNA based gene expression analyses (Figure 5B–5D) demonstrated a diminished expression of SOCE regulatory molecules Orai1 and STIM1, and drug resistance protein P-gp. However, SIK3 expression (Figure 5E) remained unchanged with or without Orai1 knock down in MCF-7s cell induced tumors. These data indicated

to us that SIK3 is upstream to SOCE regulators in high salt mediated tumorigenicity of breast cancer cells.

### Critical role of SIK3 in high salt mediated enhanced tumorigenicity

Previous phosphoproteomics based data from our laboratory demonstrated an enhanced expression and phosphorylation of SIK3 in breast cancer cells following high salt treatment. Further, we have shown that SIK3 mediates G0/G1-cell cycle release leading to mitotic cell division and cell proliferation [6]. Our initial studies (Figures 4 and 5) have demonstrated an enhanced expression of SIK3 in high salt passaged MCF-7s breast cancer cells. Therefore, we tested if SIK3 plays a role in SOCE mediated calcium influx following high salt treatment. As shown in Figure 6A, 6B, thapsigargin emptied intracellular Ca<sup>2+</sup> stores in the absence of extracellular Ca<sup>2+</sup>, followed by the Ca<sup>2+</sup> influx measured by addition of 2 mM extracellular Ca<sup>2+</sup> demonstrated that knock down of SIK3 reduced calcium influx and thus suggesting that SIK3 plays a direct role in calcium influx. To determine the tumorigenicity, we injected shRNA mediated SIK3 knock out MCF-7s cells into Nu/J mice. As shown in Figure 6C, tumor volume at the end of day 39 in mice injected with high salt passaged MCF-7s cells was  $478 \pm 79$  mm<sup>3</sup>; while tumor volume in mice injected by SIK3-KO-MCF-7s cells on day 39 was  $164 \pm 57$  mm<sup>3</sup> ( $p < 0.05$ ). Further, mRNA based gene expression analyses (Figure 6D–6G) demonstrated a diminished expression of SIK3, SOCE regulatory molecules Orai1 and STIM1, and drug resistance protein P-gp. These data clearly demonstrated to us that SIK3 is upstream signaling molecule to SOCE regulated calcium influx in high salt mediated tumorigenicity of breast cancer cells.

### Specific anti-tumor effect of prostratin on high salt treated breast cancer cells

We have recently demonstrated that prostratin, a small molecule identified in the tea from the bark of Somoan tree and extensively studied in HIV research, induced a cytotoxic effect specifically on high salt treated breast cancer cells potentially through SIK3 inhibition [19]. We tested if prostratin could inhibit calcium influx and the tumorigenicity of high salt passaged breast cancer cells. We have orally administered prostratin (100  $\mu$ M)

into Nu/J mice two weeks prior to injection of MCF-7s cells. As shown in Figure 7A and 7B, thapsigargin emptied intracellular  $\text{Ca}^{2+}$  stores in the absence of extracellular  $\text{Ca}^{2+}$ , followed by the  $\text{Ca}^{2+}$  influx measured by addition of 2 mM extracellular  $\text{Ca}^{2+}$  along with 8  $\mu\text{M}$  prostratin demonstrated reduced calcium influx compared with vehicle control treated MCF-7 cells. Further, we orally administered prostratin (100  $\mu\text{M}$ ) into Nu/J mice two weeks prior to injection of MCF-7s cells. As shown in Figure 7C, tumor volume at the end of day 39 in mice injected with vehicle treated high salt passaged MCF-7s cells was  $491 \pm 68 \text{ mm}^3$ ; while tumor volume in mice injected by prostratin treated MCF-7s cells on day 39 was  $245 \pm 62 \text{ mm}^3$  ( $p < 0.05$ ). However, prostratin treatment in MCF-7 cells cultured under basal conditions did not demonstrate inhibition of tumorigenicity. Further, mRNA based gene expression analyses (Figure 7D–7G) demonstrated a diminished expression of SIK3, SOCE regulatory molecules Orail and STIM1, and drug resistance protein P-gp. These data clearly demonstrated to us that prostratin exerts anti-tumor effect specifically on high salt pre-treated breast cancer cells possibly through inhibition of SIK3-SOCE signaling.

## DISCUSSION

$\text{Ca}^{2+}$  is one of the most important signaling molecules known to regulate multiple cellular processes including, transcription, secretion of intracellular

cytokines and cell division [20]. Multiple lines of evidence strongly suggests that cancer cells upregulate intracellular  $\text{Ca}^{2+}$ -related signaling along with constant alterations in the expression and/or activity of calcium channels and pumps on the cell membrane [21]. Cancer cells are considered to undergo these changes to sustain their own cellular proliferation and to avoid cell death events. Human sodium-MRI evidence demonstrated high sodium concentration in breast tumors [7], although the functional significance of this high sodium in tumor microenvironment is unknown. While the exact reasons for the high sodium concentration in tumor microenvironment are unknown, previous studies from our laboratory demonstrated that high salt treatment on breast cancer cells induced inflammatory and cell proliferative responses [5, 22, 23]. As calcium signaling is one of the key mediators of these cellular responses too, in this study we evaluated if high salt treatment induces  $\text{Ca}^{2+}$  influx. Our current studies demonstrated that high salt treatment in breast cancer cells induced inflammatory response through SOCE regulated  $\text{Ca}^{2+}$  influx mediated signaling. Our current cancer cellular evidence corroborates well with evidence by Yang *et al.*, wherein, they have shown SOCE mediated signaling is critical for the invasiveness of breast cancer cells [24]. These data suggest that SOCE regulated  $\text{Ca}^{2+}$  influx mediated signaling plays a critical role in multiple pro-cancer cellular processes. Further studies are needed to confirm our observations utilizing

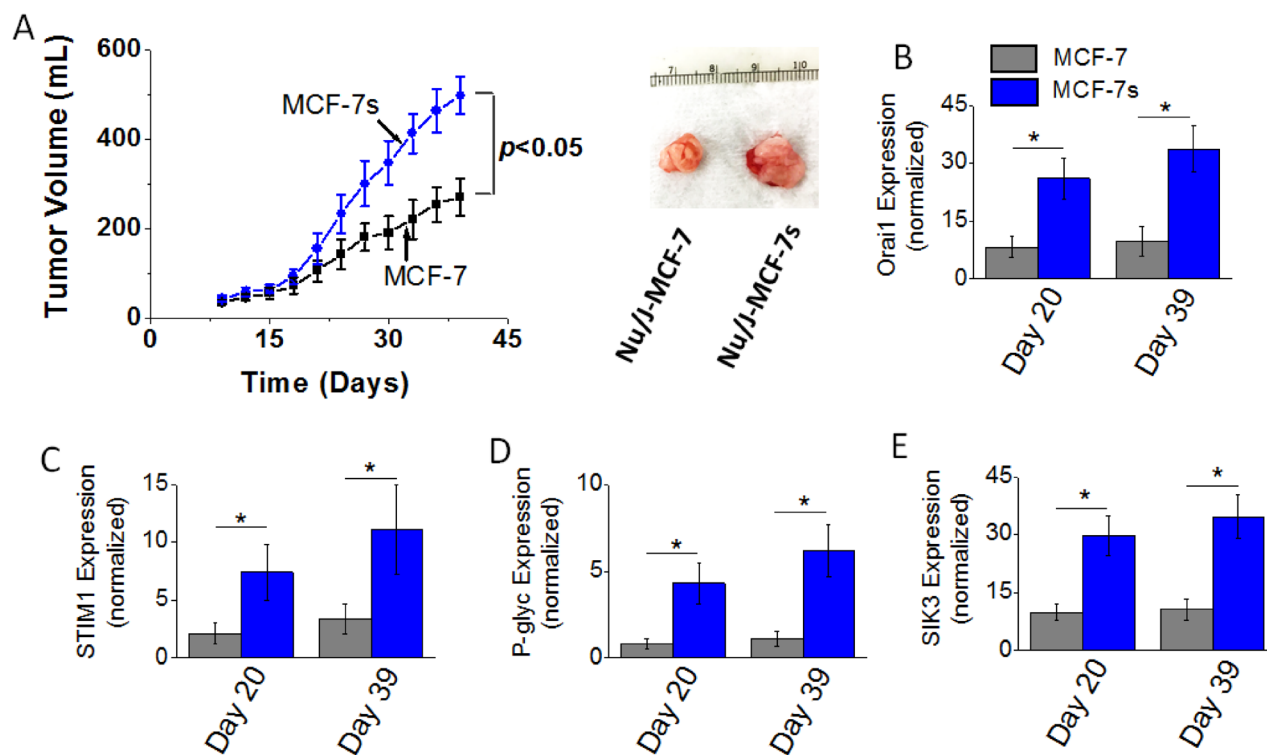

**Figure 4: Tumorigenicity of MCF-7 and MCF-7s breast cancer cells.** (A) Temporal changes in the tumor volume following injection of  $5 \times 10^5$  MCF-7 and MCF-7s cells into Nu/J ( $n = 6$ ) mice. (B–E) The mRNA expression of Orail (B), STIM1 (C), P-glycoprotein (D), and SIK3 (E). Data were represented as mean  $\pm$  SEM,  $n = 6$  per cohort,  $p < 0.05$ .

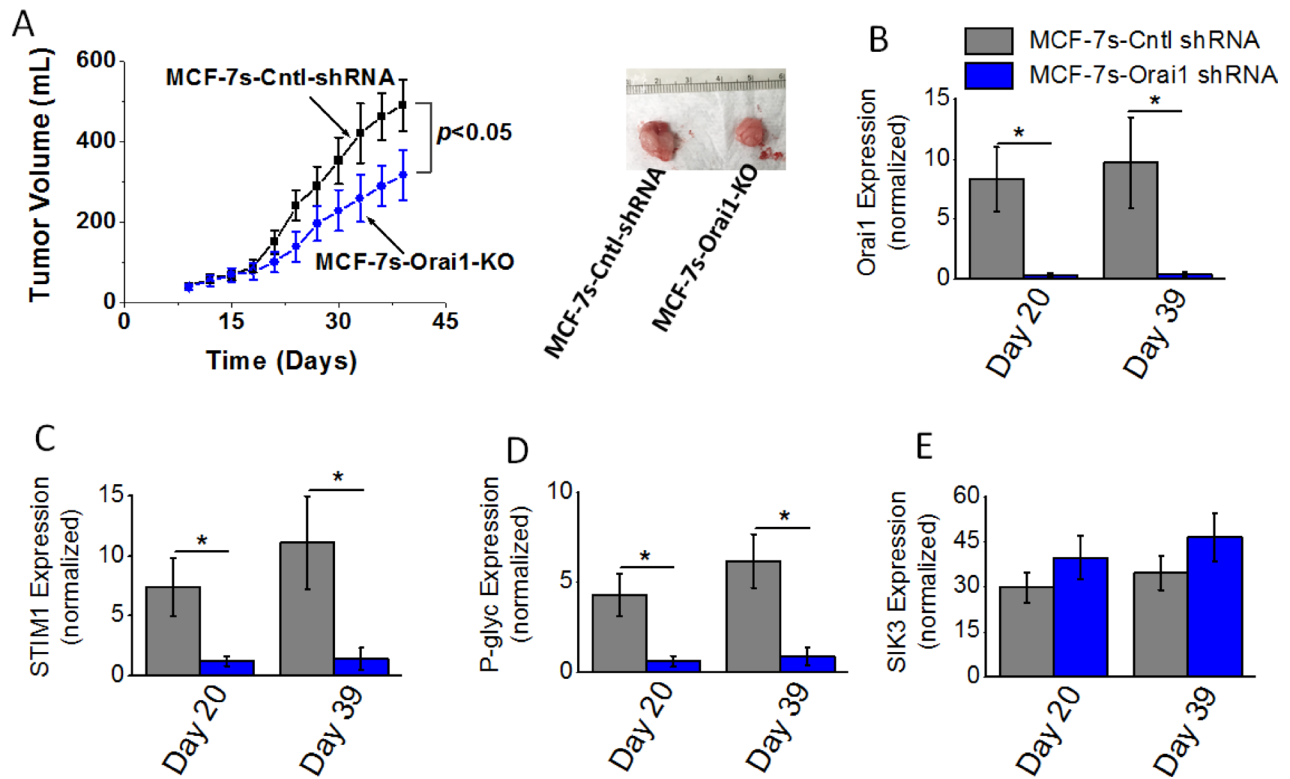

**Figure 5: Tumorigenicity of high salt passaged breast cancer cells following shRNA knock down of Orai1 expression.** (A) Temporal changes in the tumor volume following injection of  $5 \times 10^5$  MCF-7 and MCF-7s cells into Nu/J ( $n = 6$ ) mice. (B–E) The mRNA expression of Orai (B), STIM1 (C), P-glycoprotein (D) and SIK3 (E). Data were represented as mean  $\pm$  SEM,  $n = 6$  per cohort,  $p < 0.05$ .

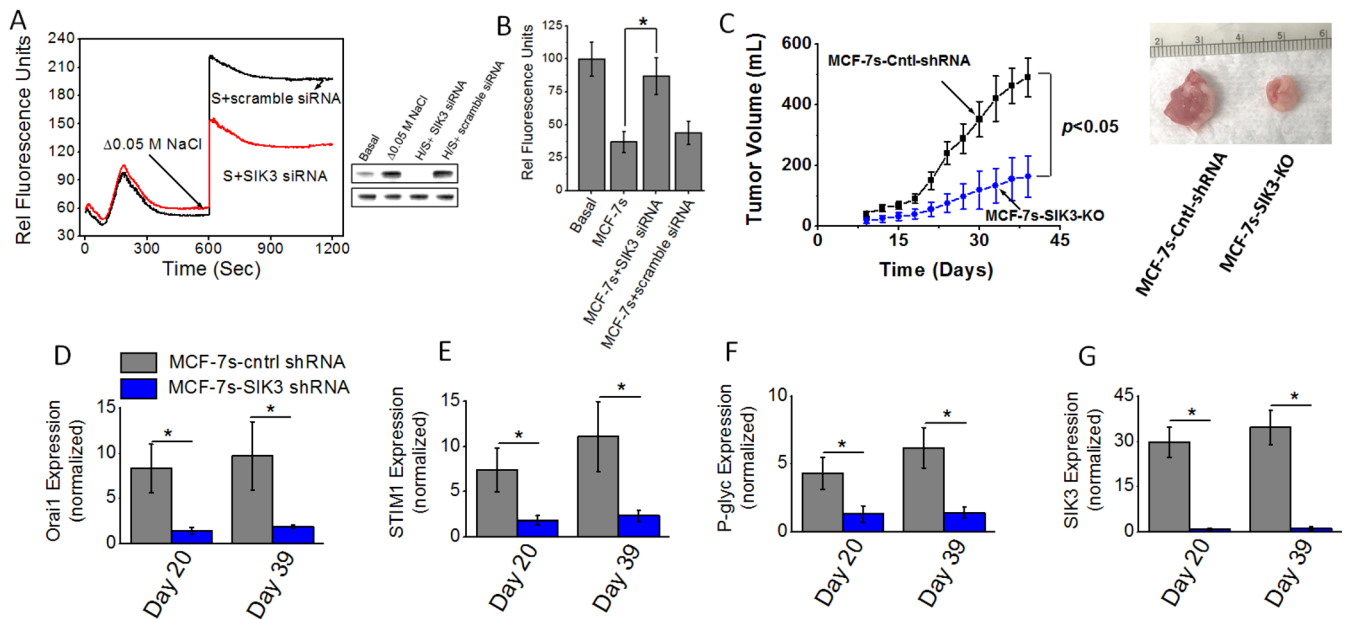

**Figure 6: (A)** Fluo-3  $\text{Ca}^{2+}$  measurement following siRNA knock down of SIK3 in MCF-7 cells. Western blot analysis to demonstrate SIK3-siRNA knock down efficiency (H/s refers to high salt). (B) Impact of high salt treatment plus SIK3 knock down on intracellular Rhodamine-123 accumulation. (C) Tumorigenicity of high salt passaged breast cancer cells following shRNA knock down of SIK3 expression. Temporal changes in the tumor volume following injection of  $5 \times 10^5$  MCF-7 and MCF-7s cells into Nu/J ( $n = 6$ ) mice. (D–G) The mRNA expression of Orai (D), STIM1 (E), P-glycoprotein (F) and SIK3 (G). Data were represented as mean  $\pm$  SEM,  $n = 6$  per cohort,  $p < 0.05$ .



complete and conditional STIM1 and Orai1 knock out murine models. Also in it important to note that STIM1 expression is influenced by temperature changes [25]. As inflammatory responses could induced local changes in the basal cellular temperatures, future studies are needed to study the impact of temperature on high salt induced SOCE expression.

The overexpression of P-gp is one of the well-known mechanisms by which breast cancers cells develop chemo-drug resistance [26]. In this study we investigated if high salt treatment induces expression of P-gp. We demonstrated that high salt induces paclitaxel resistance through SOCE regulated  $Ca^{2+}$  influx mediated signaling P-gp overexpression (Figure 8). Xie *et al.* have demonstrated that the expression of P-gp is also regulated by post-translational events, such as post-transcriptional glycosylation and membrane localization of P-gp [27]. Therefore, using rhodamine 123 assay we demonstrated that high salt induces stable localization of P-gp and thus possibly inhibiting paclitaxel mediated cytotoxicity on breast cancer cells. Complex functional mechanisms have been noted between the P-gp-mediated drug resistance and intracellular calcium homeostasis. Our current studies support the previous studies by Gibalova *et al.*, where in they demonstrated that the  $Ca^{2+}$  influx was enhanced in cells with P-gp overexpression [28]. Further, a higher intracellular calcium concentration was noted in P-gp-positive MCF-7 breast cancer cells as compared with its P-gp-negative MCF-7 cells [29]. Taken together, our current studies support a notion that high salt in the tumor microenvironment induce P-gp mediated drug resistance in breast cancer.

SOCE regulate  $Ca^{2+}$  signaling has been implicated in various oncological processes including dysplasia, metastasis and angiogenesis [30]. SOCE is also known to induce extracellular secretion of vascular endothelial growth factor (VEGF), which increase tumor vascularity and tumor progression [31]. While SOCE in cancer cells is known to promote tumorigenicity, SOCE mediated  $Ca^{2+}$  signaling in known to activate cytotoxic CD8+T-lymphocytes which induce anti-tumor effect [32]. Therefore, to specifically study the tumorigenic role of high salt induced SOCE in cancer cells we performed *in vivo* studies in the immunodeficient Nu/J mice. Our *in vivo* studies demonstrated that high salt pre-treated breast cancer cells display enhanced tumorigenicity compared with breast cancer cells passaged under basal media culture conditions. These data point out an important functional role of high salt towards breast tumor progression.

Previous phosphoproteomics based studies from our laboratory demonstrated overexpression and phosphorylation of SIK3 following high salt treatment [6]. Further we reported that prostratin, a small molecule inhibitor, known to inhibit HIV reactivation in CD4+T-lymphocytes, plays an important role in SIK3inhibition [19]. In our current study, we demonstrated that prostratin was specifically effective against high salt pre-treated breast cancer cells. This supports our previous *in vitro* studies wherein we demonstrated that prostratin was upto 5 fold more cytotoxic on high salt pre-treated breast cancer cells.

In conclusion, we determined the molecular functionality of high salt on breast cancer cells towards induction of their tumorigenicity and drug resistance through SOCE regulated  $Ca^{2+}$  influx. The Orai1 and STIM1 inhibition could offer novel anti-cancer therapeutic

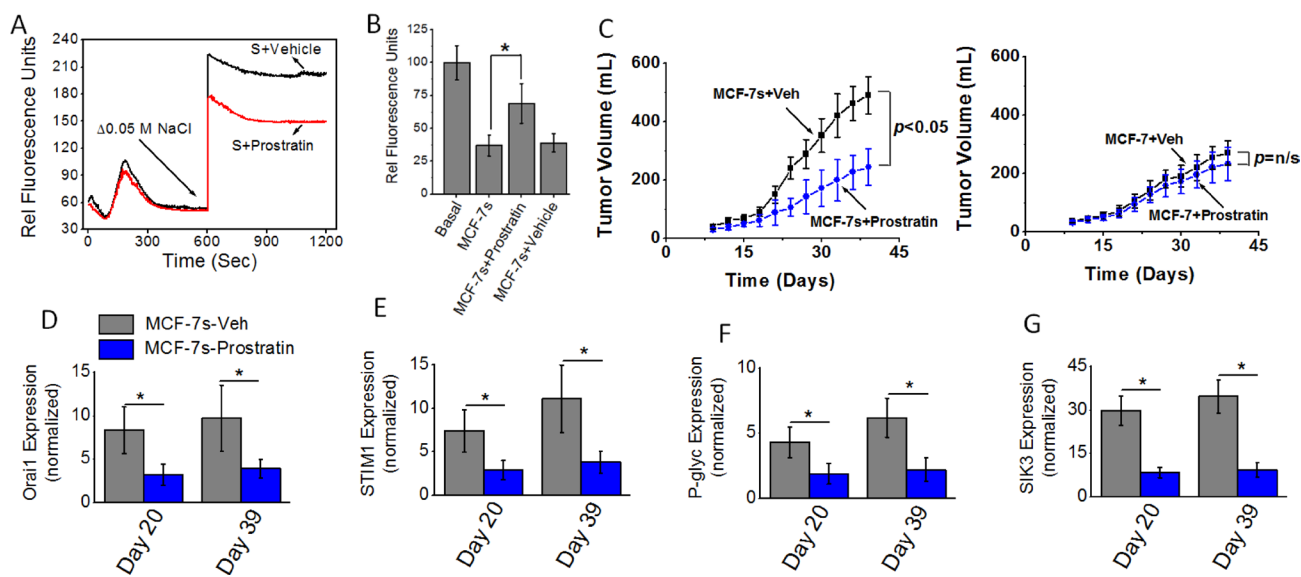

**Figure 7:** (A) Fluo-3  $Ca^{2+}$  measurement following Prostratin (8  $\mu$ M) plus high salt treatment on MCF-7 cells. (B) Impact of high salt plus Prostratin (8  $\mu$ M) treatment on intracellular Rhodamine-123 accumulation. (C) Tumorigenicity of high salt passaged breast cancer cells following oral administration of prostratin (100  $\mu$ M). Temporal changes in the tumor volume following injection of  $5 \times 10^5$  MCF-7 and MCF-7s cells into Nu/J ( $n = 6$ ) mice. (D–G) The mRNA expression of Orai (D), STIM1 (E), P-glycoprotein (F) and SIK3 (G). Data were represented as mean  $\pm$  SEM,  $n = 6$  per cohort,  $p < 0.05$ .

strategies. Further, our current evidence to support the anti-tumor effect of prostratin could evoke further research to study the potential novel application of this small molecule inhibitor as an independent or add-on drug to the current breast cancer treatment regimen.

## MATERIALS AND METHODS

### Cell culture

Breast cancer cells (MCF7 and MDA-MB-231) were utilized and obtained from the American Type Culture Collection (ATCC, Manassas, VA) and cultured in cell basal essential media (RPMI1640 media, Thermo Fisher Scientific, Waltham, MA) along with the media supplements such as fetal bovine serum, penicillin/streptomycin, fungizone, HEPES and glutamine, as recommended by the manufacturer and as previously described [5, 33]. Cell lines were frozen in liquid vapor nitrogen at  $-130^{\circ}\text{C}$  until use. Upon thawing, cells were maintained in 5%  $\text{CO}_2$  incubator in sterile essential media at  $37^{\circ}\text{C}$ . For salt treatment conditions, cell culture media was supplemented with 0.05 M NaCl (Sigma Aldrich, St Louis, MO). We have previously performed a dose-response for salt (0–0.1 M NaCl) and found-out that 0.05 M NaCl provided highest cell proliferation [5, 23]. All chemicals unless mentioned were obtained

either from Sigma Aldrich (St Louis, MO) or Thermo Fisher Scientific (Waltham, MA). The siRNA constructs against human STIM1 and Orai1 were generated using the pSUPER.retro vector according to the manufacturer's instructions (OligoEngine). The sequences used were 5'-GGCTCTGGATACAGTGCTC-3' for STIM1 and 5'-CGTGCACAATCTCAACTCG-3' for Orai1; 5'-GTGCAGAGTGTGGAGTCC-3' for SIK3. siRNA-transfected cells were selected using puromycin. For murine injections cells were transfected by the following shRNA: Orai shRNA (sc-76001-SH, Santa Cruz Biotech), and SIK3 shRNA (sc-97056-SH, Santa Cruz Biotech). Prostratin (Sigma Aldrich) treatment on cell lines was performed to determine the effect of the drug on calcium influx. All other chemical unless mentioned were obtained from Sigma Aldrich and Invitrogen.

### Animal studies

All animal work was performed in accordance with protocols approved by the Institutional Animal Care and Use Committee of Vanderbilt University Medical Center. Immunodeficient Nu/J mice (Jackson labs) mice were used for studying the tumorigenicity. The MCF-7 (and high salt passaged MCF-7s) cells were trypsinized and washed with PBS before intramammary injection ( $5 \times 10^5$  cells/mice) into mice. The tumor volume was calculated using the

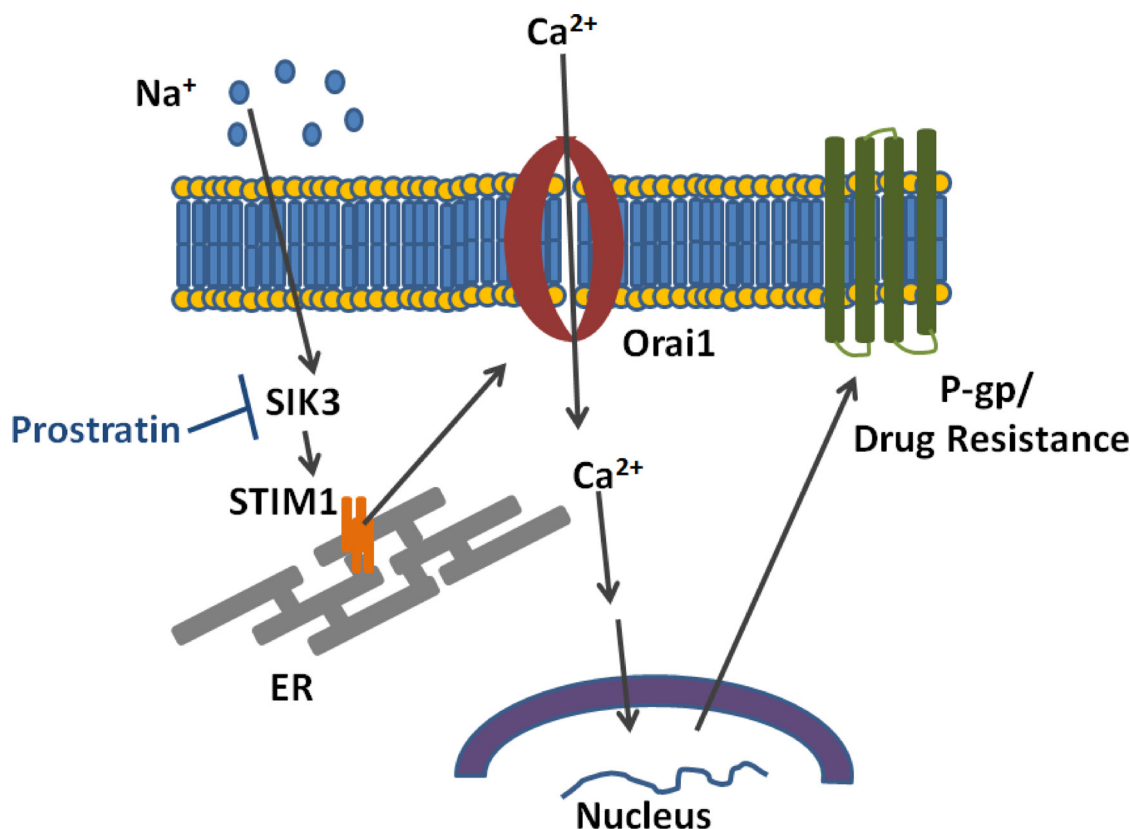

**Figure 8:** Schematic on the mechanism by which high salt induces calcium influx and P-glycoprotein mediated drug resistance.

formula  $V = (W^2) \times L/2$  from caliper measurements, where  $V$  is tumor volume,  $W$  is tumor width and  $L$  is tumor length [34].

## Westernblot

Total proteins were extracted from cells with lysis buffer for Western blot analysis as previously described [35, 36]. Total proteins were separated on a 4–12% sodium dodecyl sulfate-polyacrylamide gradient gel and transferred onto a nitrocellulose membrane. The membranes were blocked overnight at 4° C in Tris-buffered saline with 0.05% Tween 20 (5% nonfat milk in 10 mM Tris-HCl-100 mM NaCl-0.1% Tween 20, pH 7.4). The membranes were incubated first with Abs specific for total and phosphorylated forms at room temperature with primary Abs diluted 1 in 1,000 in blocking buffer for 2 hrs, and then with a horseradish peroxidase-conjugated secondary IgG mAb diluted 1 in 5,000 for 1hr. All primary and secondary Abs were obtained from Santa Cruz Biotech (Dallas, TX). The following specific primary antibodies to Orail (sc-377281), STIM1 (sc-66173), P-gp (sc-55510), GADPH (sc-47724) and Actin (sc-8432) were used. The membrane was developed using the chemiluminescence kit (Millipore) and analyzed on using Bio-Rad Universal Hood II (Hercules, CA). Morphometric analysis was done using the software provided by the company.

## Quantitative real time polymerase chain reaction (qRT-PCR)

Expression profiles of genes at mRNA level in the breast cancer cell lines were analyzed using the TaqMan FAM-labeled RT-PCR primers for SIK3 (Hs00228549\_m1), STIM1 (Hs00963377\_m1), Orail(Hs00385627\_m1), P-gp (Hs00184500\_m1), GADPH (Hs402869), and Actin (Hs4333762T), obtained from Applied Biosystems/Thermo Fisher Scientific (Grand Island, NY) as per the manufacturer's recommendation. Briefly, total RNA was extracted from  $10^6$  cells using TRIzol reagent (Sigma–Aldrich) and analyzed as mentioned previously [22, 37, 38]. RNA samples were quantified by absorbance at 260 nm. The RNA was reverse-transcribed and RT-PCR (real time PCR) was performed in a final reaction volume of 20  $\mu$ L using BioRad CFX96 (Hercules, CA). Each sample was analyzed in triplicate. Cycling conditions consisted of an initial denaturation of 95° C for 15min, followed by 40 cycles of 72° C for 30 s, followed by 61° C for 1 min.

## Calcium influx assay

Calcium assays were performed using Fluo-3 (Sigma Aldrich) solubilized to 10 mg/ml with dimethyl sulfoxide. Cells were loaded with 4  $\mu$ g/ml Fluo-3 for 30 minutes at 37° C. Cells were washed three times in HEPES

buffered saline solution (HBSS with 1 mM CaCl<sub>2</sub>, 0.5 mM MgCl<sub>2</sub>, 0.1% BSA, 10 mM HEPES) and resuspended to  $1 \times 10^6$  cells/ml in HEPES buffered saline solution. For measurement of store-operated Ca<sup>2+</sup> influx, 3 mM EGTA and 2 mM thapsigargin were added to deplete internal calcium stores. Ca<sup>2+</sup> influx was induced by subsequent addition of 2 mM Ca<sup>2+</sup> (free) after store depletion [24, 39]. The emission wavelength set at ( $\lambda_{em}$ ) 485 nm and capture excitation wavelength set ( $\lambda_{ex}$ ) at 520 nm. The relative fluorescence detection was performed using FilterMax F5 spectrophotometer (Molecular Devices, Sunnyvale, CA) and data obtained using instrument software.

## Rhodamine 123 assay

P-gp activity was determined by measuring intracellular accumulation of rhodamine 123 [40]. The breast cancer cells under various treatment conditions. Briefly, cells were incubated at 37° C with 5.25  $\mu$ M rhodamine 123 for 60 min. After washing in HBSS, cells were lysed in distilled water, and intracellular levels of rhodamine 123 were quantified by FilterMax F5 spectrophotometer (Molecular Devices, Sunnyvale, CA) and data obtained using instrument software. The emission wavelength set at ( $\lambda_{em}$ ) 485 nm and capture excitation wavelength set ( $\lambda_{ex}$ ) at 535 nm. Data were expressed as percentage (%) of rhodamine 123 accumulation in control cells arbitrarily set at 100%.

## Statistical Analysis

Data are expressed as mean  $\pm$  SEM from five independent studies. Statistical differences between means were analyzed using a paired or unpaired Student's *t* test. A value of *p* less than 0.05 was considered significant. All data analysis was obtained using Origin 6 software (Origin Labs, Northampton, MA) or SPSS software, version 21 (IBM corporation, Armonk, NY).

## Author contributions

Project Conceived: VT; Designed the experiments: MI, PL, JMT and VT; Performed the experiments: DB, SA, YZ and VT. All other data was analyzed by DA, SA and VT. Wrote the paper: DA, SA and VT. All authors approved the final version of the paper.

## CONFLICTS OF INTEREST

The authors have no conflicts of interest.

## FUNDING

This work was supported by NIH-5U54CA163066 (VT).

## REFERENCES

1. American Cancer Society. Cancer Facts & Figures 2018. Atlanta: American Cancer Society. 2018.
2. Siegel RL, Miller KD, Jemal A. Cancer statistics. *CA Cancer J Clin*. 2018; 68:7–30.
3. Vazquez AI, Veturi Y, Behring M, Shrestha S, Kirst M, Resende MF Jr, de Los Campos G. Increased Proportion of Variance Explained and Prediction Accuracy of Survival of Breast Cancer Patients with Use of Whole-Genome Multiomic Profiles. *Genetics*. 2016; 203:1425–38.
4. Mittal D, Gubin MM, Schreiber RD, Smyth MJ. New insights into cancer immunoediting and its three component phases--elimination, equilibrium and escape. *Curr Opin Immunol*. 2014; 27:16–25.
5. Amara S, Ivy MT, Myles EL, Tiriveedhi V. Sodium channel gammaENaC mediates IL-17 synergized high salt induced inflammatory stress in breast cancer cells. *Cell Immunol*. 2016; 302:1–10.
6. Amara S, Majors C, Roy B, Hill S, Rose KL, Myles EL, Tiriveedhi V. Critical role of SIK3 in mediating high salt and IL-17 synergy leading to breast cancer cell proliferation. *PLoS One*. 2017; 12:e0180097.
7. Ouwerkerk R, Jacobs MA, Macura KJ, Wolff AC, Stearns V, Mezban SD, Khouri NF, Bluemke DA, Bottomley PA. Elevated tissue sodium concentration in malignant breast lesions detected with non-invasive  $^{23}\text{Na}$  MRI. *Breast Cancer Res Treat*. 2007; 106:151–60.
8. Zaric O, Pinker K, Zbyn S, Strasser B, Robinson S, Minarikova L, Gruber S, Farr A, Singer C, Helbich TH, Trattnig S, Bogner W. Quantitative Sodium MR Imaging at 7 T: Initial Results and Comparison with Diffusion-weighted Imaging in Patients with Breast Tumors. *Radiology*. 2016; 280:39–48.
9. Stewart TA, Yapa KT, Monteith GR. Altered calcium signaling in cancer cells. *Biochim Biophys Acta*. 2015; 1848:2502–11.
10. Chen YF, Chiu WT, Chen YT, Lin PY, Huang HJ, Chou CY, Chang HC, Tang MJ, Shen MR. Calcium store sensor stromal-interaction molecule 1-dependent signaling plays an important role in cervical cancer growth, migration, and angiogenesis. *Proc Natl Acad Sci U S A*. 2011; 108:15225–30.
11. McAndrew D, Grice DM, Peters AA, Davis FM, Stewart T, Rice M, Smart CE, Brown MA, Kenny PA, Roberts-Thomson SJ, Monteith GR. ORAI1-mediated calcium influx in lactation and in breast cancer. *Mol Cancer Ther*. 2011; 10:448–60.
12. Umemura M, Baljinnayam E, Feske S, De Lorenzo MS, Xie LH, Feng X, Oda K, Makino A, Fujita T, Yokoyama U, Iwatsubo M, Chen S, Goydos JS, et al. Store-operated  $\text{Ca}^{2+}$  entry (SOCE) regulates melanoma proliferation and cell migration. *PLoS One*. 2014; 9:e89292.
13. Abdallah HM, Al-Abd AM, El-Dine RS, El-Halawany AM. P-glycoprotein inhibitors of natural origin as potential tumor chemo-sensitizers: A review. *J Adv Res*. 2015; 6:45–62.
14. Azimi I, Roberts-Thomson SJ, Monteith GR. Calcium influx pathways in breast cancer: opportunities for pharmacological intervention. *Br J Pharmacol*. 2014; 171:945–60.
15. Jing Z, Sui X, Yao J, Xie J, Jiang L, Zhou Y, Pan H, Han W. SKF-96365 activates cytoprotective autophagy to delay apoptosis in colorectal cancer cells through inhibition of the calcium/CaMKIIgamma/AKT-mediated pathway. *Cancer Lett*. 2016; 372:226–38.
16. Xia J, Wang H, Huang H, Sun L, Dong S, Huang N, Shi M, Bin J, Liao Y, Liao W. Elevated Orai1 and STIM1 expressions upregulate MACC1 expression to promote tumor cell proliferation, metabolism, migration, and invasion in human gastric cancer. *Cancer Lett*. 2016; 381:31–40.
17. Vesely MD, Schreiber RD. Cancer immunoediting: antigens, mechanisms, and implications to cancer immunotherapy. *Ann N Y Acad Sci*. 2013; 1284:1–5.
18. Liow JS, Lu S, McCarron JA, Hong J, Musachio JL, Pike VW, Innis RB, Zoghbi SS. Effect of a P-glycoprotein inhibitor, Cyclosporin A, on the disposition in rodent brain and blood of the 5-HT1A receptor radioligand, [ $^{11}\text{C}$ ](R)-(-)-RWAY. *Synapse*. 2007; 61:96–105.
19. Alotaibi D, Amara S, Johnson TL, Tiriveedhi V. Potential anticancer effect of prostratin through SIK3 inhibition. *Oncol Lett*. 2018; 15:3252–3258.
20. Machaca K.  $\text{Ca}^{2+}$  signaling, genes and the cell cycle. *Cell Calcium*. 2010; 48:243–50.
21. Karlstad J, Sun Y, Singh BB.  $\text{Ca}^{2+}$  signaling: an outlook on the characterization of  $\text{Ca}^{2+}$  channels and their importance in cellular functions. *Adv Exp Med Biol*. 2012; 740:143–57.
22. Amara S, Alotaibi D, Tiriveedhi V. NFAT5/STAT3 interaction mediates synergism of high salt with IL-17 towards induction of VEGF-A expression in breast cancer cells. *Oncol Lett*. 2016; 12:933–943.
23. Amara S, Zheng M, Tiriveedhi V. Oleanolic Acid Inhibits High Salt-Induced Exaggeration of Warburg-like Metabolism in Breast Cancer Cells. *Cell Biochem Biophys*. 2016; 74:427–34.
24. Yang S, Zhang JJ, Huang XY. Orai1 and STIM1 are critical for breast tumor cell migration and metastasis. *Cancer Cell*. 2009; 15:124–34.
25. Xiao B, Coste B, Mathur J, Patapoutian A. Temperature-dependent STIM1 activation induces  $\text{Ca}^{2+}$  influx and modulates gene expression. *Nat Chem Biol*. 2011; 7:351–8.
26. Callaghan R, Luk F, Bebawy M. Inhibition of the multidrug resistance P-glycoprotein: time for a change of strategy? *Drug Metab Dispos*. 2014; 42:623–31.



27. Xie Y, Burcu M, Linn DE, Qiu Y, Baer MR. Pim-1 kinase protects P-glycoprotein from degradation and enables its glycosylation and cell surface expression. *Mol Pharmacol*. 2010; 78:310–8.
28. Sulova Z, Seres M, Barancik M, Gibalova L, Uhrík B, Polekova L, Breier A. Does any relationship exist between P-glycoprotein-mediated multidrug resistance and intracellular calcium homeostasis. *Gen Physiol Biophys*. 2009; 28:F89–95.
29. Bao L, Hazari S, Mehra S, Kaushal D, Moroz K, Dash S. Increased expression of P-glycoprotein and doxorubicin chemoresistance of metastatic breast cancer is regulated by miR-298. *Am J Pathol*. 2012; 180:2490–503.
30. Xie J, Pan H, Yao J, Zhou Y, Han W. SOCE and cancer: Recent progress and new perspectives. *Int J Cancer*. 2016; 138:2067–77.
31. Bergmeier W, Weidinger C, Zee I, Feske S. Emerging roles of store-operated Ca(2)(+) entry through STIM and Orai proteins in immunity, hemostasis and cancer. *Channels (Austin)*. 2013; 7:379–91.
32. Shaw PJ, Feske S. Regulation of lymphocyte function by Orai and STIM proteins in infection and autoimmunity. *J Physiol*. 2012; 590:4157–67.
33. Tiriveedhi V, Gelman AE, Mohanakumar T. HIF-1 $\alpha$  signaling by airway epithelial cell K- $\alpha$ 1-tubulin: role in fibrosis and chronic rejection of human lung allografts. *Cell Immunol*. 2012; 273:59–66.
34. Faustino-Rocha A, Oliveira PA, Pinho-Oliveira J, Teixeira-Guedes C, Soares-Maia R, da Costa RG, Colaco B, Pires MJ, Colaco J, Ferreira R, Ginja M. Estimation of rat mammary tumor volume using caliper and ultrasonography measurements. *Lab Anim (NY)*. 2013; 42:217–24.
35. Tiriveedhi V, Tucker N, Herndon J, Li L, Sturmoski M, Ellis M, Ma C, Naughton M, Lockhart AC, Gao F, Fleming T, Goedegebuure P, Mohanakumar T, et al. Safety and preliminary evidence of biologic efficacy of a mammaglobin-a DNA vaccine in patients with stable metastatic breast cancer. *Clin Cancer Res*. 2014; 20:5964–75.
36. Tiriveedhi V, Angaswamy N, Brand D, Weber J, Gelman AG, Hachem R, Trulock EP, Meyers B, Patterson G, Mohanakumar T. A shift in the collagen V antigenic epitope leads to T helper phenotype switch and immune response to self-antigen leading to chronic lung allograft rejection. *Clin Exp Immunol*. 2012; 167:158–68.
37. Tiriveedhi V, Takenaka M, Ramachandran S, Gelman AE, Subramanian V, Patterson GA, Mohanakumar T. T regulatory cells play a significant role in modulating MHC class I antibody-induced obliterative airway disease. *Am J Transplant*. 2012; 12:2663–74.
38. Tiriveedhi V, Takenaka M, Sarma NJ, Gelman AG, Mohanakumar T. Anti-major histocompatibility complex-induced obliterative airway disease: selective role for CD4 and CD8 T cells in inducing immune responses to self-antigens. *J Heart Lung Transplant*. 2013; 32:714–22.
39. Honorio-Franca AC, Nunes GT, Fagundes DL, de Marchi PG, Fernandes RT, Franca JL, Franca-Botelho Ado C, Moraes LC, Varotti Fde P, Franca EL. Intracellular calcium is a target of modulation of apoptosis in MCF-7 cells in the presence of IgA adsorbed to polyethylene glycol. *Oncotargets Ther*. 2016; 9:617–26.
40. Jouan E, Le Vee M, Mayati A, Denizot C, Parmentier Y, Fardel O. Evaluation of P-Glycoprotein Inhibitory Potential Using a Rhodamine 123 Accumulation Assay. *Pharmaceutics*. 2016; 8:1–13.
